# Supplementary material for: Detection of Di-Butyl Phthalate in Surface Water by Fluorescence Polarization Assay and Gas Chromatography -Mass Spectrometry
Source: Preprints.org preprint supplement (doi:10.20944/preprints202307.0567.v1), 2023-07-10
Supplement: Supplementary file 1 [file supplementary]

Article

Detection of Di-Butyl Phthalate in Surface Water by Fluorescence Polarization Assay and Gas Chromatography-Mass Spectrometry

Liliya I. Mukhametova 1,2, Madina R. Karimova 1, Olga G. Zharikova 1, Andrey V. Pirogov 1, Valentina V. Levkina 1, Ekaterina S. Chichkanova 1, Liqiang Liu 3, Chuanlai Xu 3, Sergei A. Eremin 1,2*

| **Citation:** To be added by editorial staff during production.  Received: date  Revised: date  Accepted: date  Published: date  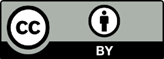  **Copyright:** © 2023 by the authors. Submitted for possible open access publication under the terms and conditions of the Creative Commons Attribution (CC BY) license (https://creativecommons.org/licenses/by/4.0/). |
| --- |

1 Department of Chemical Enzymology, Faculty of Chemistry, M. V. Lomonosov Moscow State University, Leninskie Gory 1, 119991 Moscow, Russia

2 A. N. Bach Institute of Biochemistry, Research Center of Biotechnology, Russian Academy of Sciences, Leninsky Prospect 33, 119071 Moscow, Russia

3 School of Food Science and Technology, Jiangnan University, 1800 Lihu Road, Wuxi, Jiangsu Province, 214122 China

***** Correspondence: saeremin@gmail.com; Tel.: +7 916 5127654

Mass spectra were obtained using a Q-Exactive tandem mass spectrometer coupled to an Ultimate 3000 high performance liquid chromatograph; samples were ionized by electrospray in a HESI-II ionization source (Thermo Scientific, Waltham, MA USA). Mass spectrum of the first order, the mode of registration of positively charged ions

**Figure S1.** Mass spectra of DBP-AMF sample by the isolated ion of the target compound.
